# Supplementary material for: G-Quadruplex based hydrogels stabilized by a cationic polymer as an efficient adsorbent of picric acid
Source: Royal Society of Chemistry journal article supplement (doi:10.1039/c9nj03143j), 2019-01-01
Supplement: c9nj03143j1.pdf [file c9nj03143j1.pdf]

**G-quadruplex based hydrogels stabilized by cationic polymer as  
efficient adsorbent of picric acid†**

Jin Zhang, Xiaoyang Li, Xiuping Sun, Yihan Liu, Jingcheng Hao, Yebang Tan\* and

Aixin Song\*

Key Laboratory of Colloids and Interface Chemistry (Shandong University), Ministry  
of Education, Jinan 250100, China

\* To whom correspondence should be addressed.

E-mail: songaixin@sdu.edu.cn; Tel: +86-531-88363532; Fax: +86-531-88364750(o)

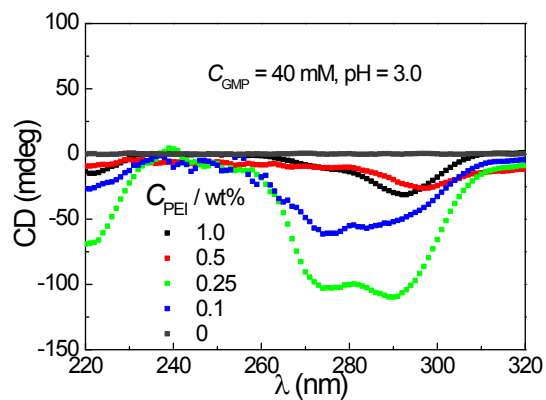

**Fig. S1** CD spectra of 40 mM GMP solution and hydrogels formed by 40 mM GMP with different concentrations of PEI. pH = 3.0.

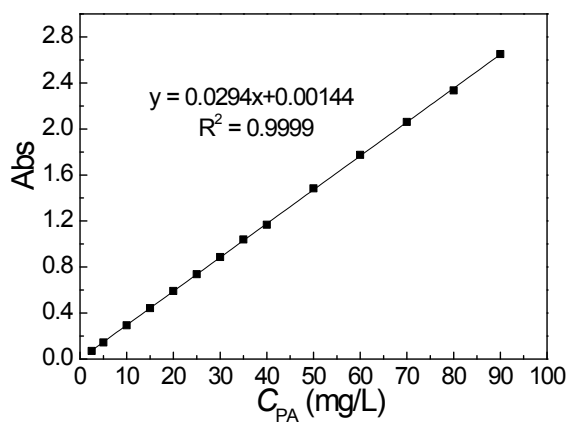

**Fig. S2** The calibration curve of PA in aqueous solution.

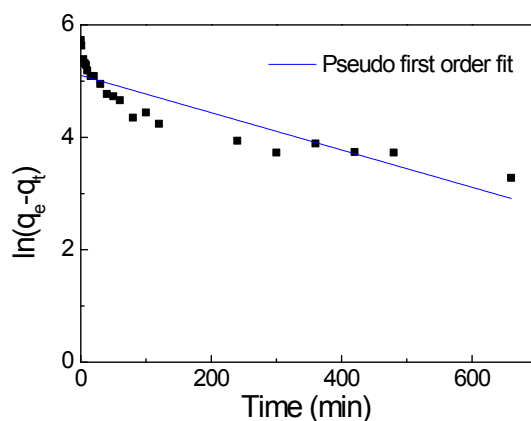

**Fig. S3** Linear plot of pseudo first-order kinetic model with 500 mg·L<sup>-1</sup> initial picric acid 200 mL and 200 mg GMP-PEI xerogel.

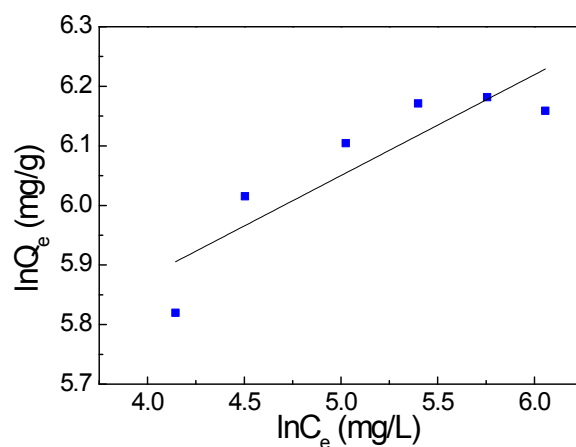

**Fig. S4** Linear plot of Freundlich isotherm.

**Table S1** Comparison of adsorption capacity of GMP-PEI xerogels for PA with reported methods. The adsorption capacity was calculated from the Langmuir isotherm model at 25 °C.

|   | Adsorbents                                      | Sorption capacity<br>( $\text{mg}\cdot\text{g}^{-1}$ ) | Refs. in text |
|---|-------------------------------------------------|--------------------------------------------------------|---------------|
| 1 | GMP-PEI xerogels                                | 507.61                                                 | this work     |
| 2 | Amberlite IRA-67                                | 31.84                                                  | [45]          |
| 3 | Silica decorated azo-azomethine host            | 68.5                                                   | [46]          |
| 4 | Troger's base-functionalised polymer            | 81.92                                                  | [47]          |
| 5 | (a) Activated carbon from almond shell          | 74.0                                                   | [48]          |
|   | (b) Magnetic activated carbon from almond shell | 73.9                                                   | [48]          |
|   | (c) Calgon carbon                               | 327.8                                                  | [48]          |
| 6 | Polymer–clay nanocomposite (dry/wet)            | 45.8/45.8                                              | [49]          |
| 7 | MWCNT-COOH                                      | 119.05                                                 | [50]          |
|   | MWCNT-Chitosan                                  | 666.67                                                 | [50]          |
